# Supplementary material
Source: PubMed Central journal article supplement (PMC9212990)
Supplement: mmc1.pdf [file mmc1.pdf]

## Supplemental Data

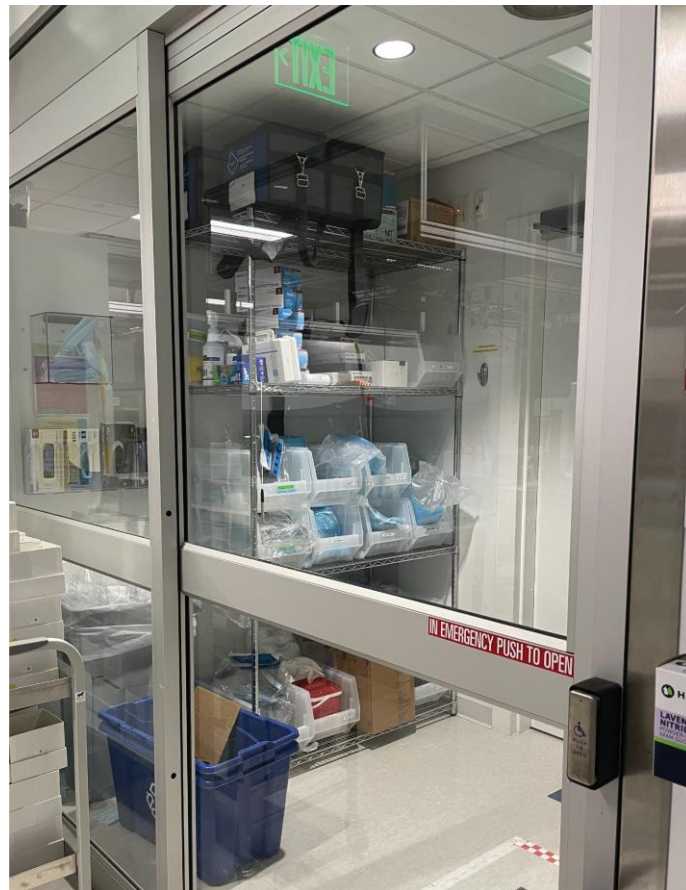

**Supplemental Figure 1** The entrance to the laboratory was modified with the installation of an automated sliding door to separate the main laboratory space from the entryway. The image shows a gowning area for laboratory staff to put on appropriate personal protective equipment. Personal protective equipment shown in this space includes gloves, lab gowns, isolation lab gowns, booties, and face shields. This image is taken from inside the laboratory looking into the Lab Entryway labeled in **Figure 2b**.

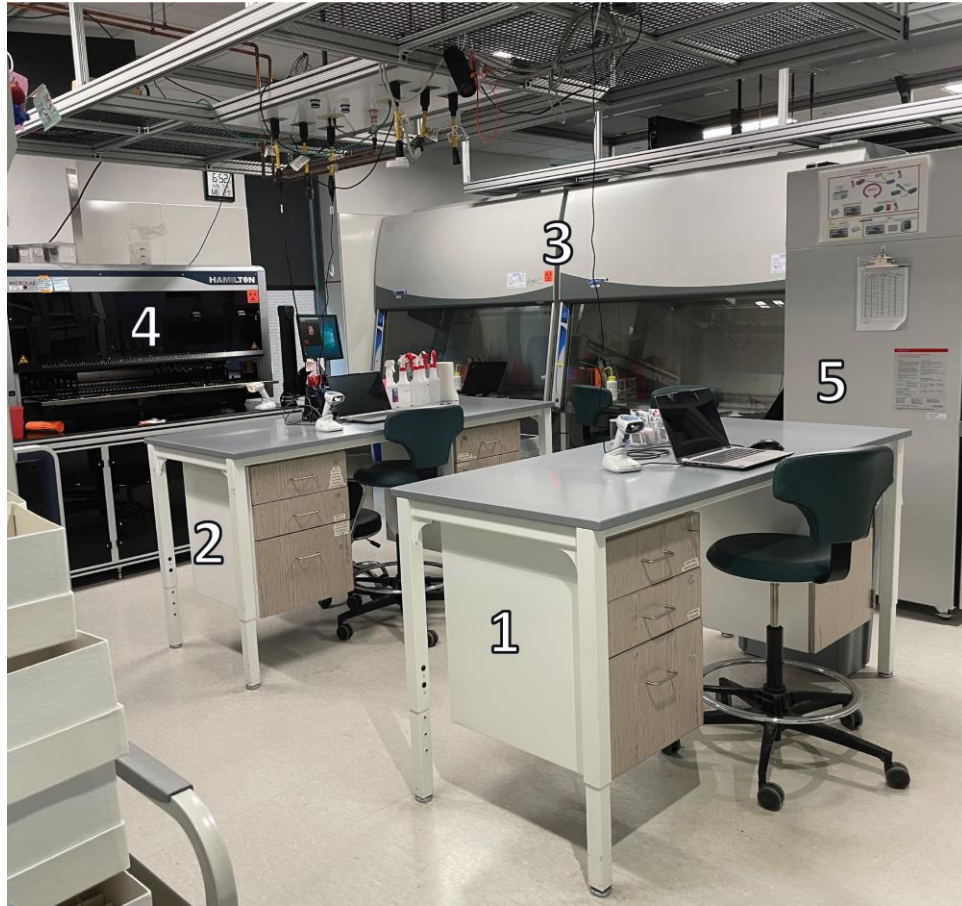

**Supplemental Figure 2** The first processing area of the laboratory has two sections, Sample Accessioning and Manual Decapping and Sample Aliquoting (**Fig. 2b**). Each section of the space has a designated task assigned to streamline the workflow and keep the working space organized. **1-2)** The sample check-in benches are where laboratory staff perform manual checks of samples entering the laboratory into the LIMS. Samples are double checked in between each step in this section of the lab. **3)** The biosafety cabinets shown are 2 of 5 biosafety cabinets designated for inactivation, decapping, and sample pooling. **4)** The Hamilton Microlab STAR in this section of the laboratory performs initial sample aliquoting into plate format. **5)** Samples are in cold storage once they arrive in the laboratory and are stored until results are reported.

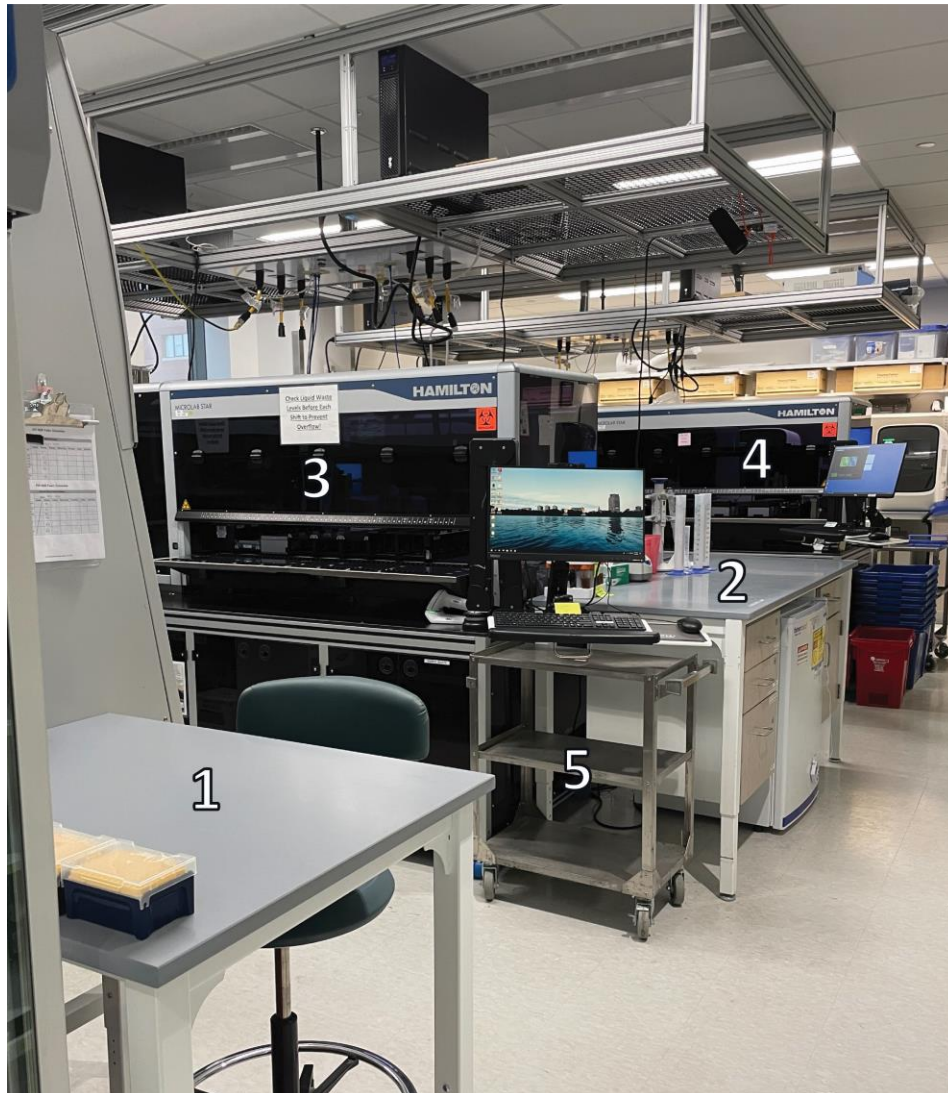

**Supplemental Figure 3** This image shows two bays of the laboratory that include RNA Extraction and qPCR Preparation (**Fig 2b**). **1)** The plates coming from Sample Aliquot will be prepared on this bench before loading on to the Hamilton Microlab STAR. **2)** Reagents needed for RNA extraction are prepared here before loading them onto the instruments. **3)** There are 3 Hamilton Microlab STAR instruments for RNA Extraction. **4)** There are 3 Microlab STAR instruments for qPCR preparation in this bay. Not shown is a bench that is exclusively used for qPCR reagent preparation. **5)** Rolling carts are used to carefully transfer reagent troughs from 2 to 3.

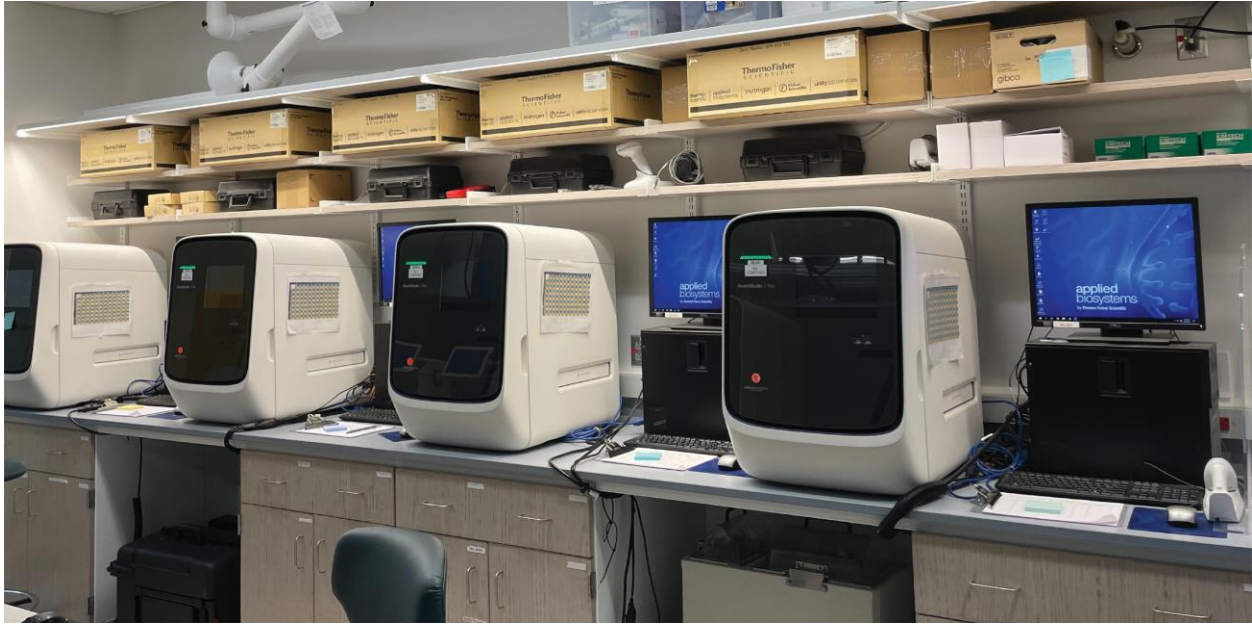

**Supplemental Figure 4** The last step of the process is RT-qPCR which are run on 1 of 4 PCR machines located on the RT-qPCR section of the laboratory (**Fig. 2b**). Plates are manually loaded into the PCR machine after being prepared on the last robot.
